# Supplementary material for: Detection of explosives with porous xerogel film from conjugated carbazole-based dendrimers
Source: Royal Society of Chemistry journal article supplement (doi:10.1039/c2tc00125j), 2012-10-31

### Supporting information

**Figure S1** SEM images of the H2-BCz xerogel from (a) chlorobenzene/ethanol (v/v=1/2), (b) xylene/ethanol (v/v=1/2) and (c) cyclohexane/n-hexane (v/v=1/2). The concentration is 5 mg/ml.

**Figure S2** SEM images of the H2-BCz xerogel from (a) toluene/methanol (v/v=1/1), (b) toluene/ethanol (v/v=1/2), (c) toluene/1-propanol (v/v=1/2), (d) toluene/1-butanol (v/v=1/2), (e) toluene/1-pentanol (v/v=1/3), (f) toluene/1-hexanol (v/v=1/3), (g) toluene/acetic acid (v/v=1/4) and (h) toluene/n-hexane (v/v=1/1). The concentration is 5 mg/ml.

**Figure S1**

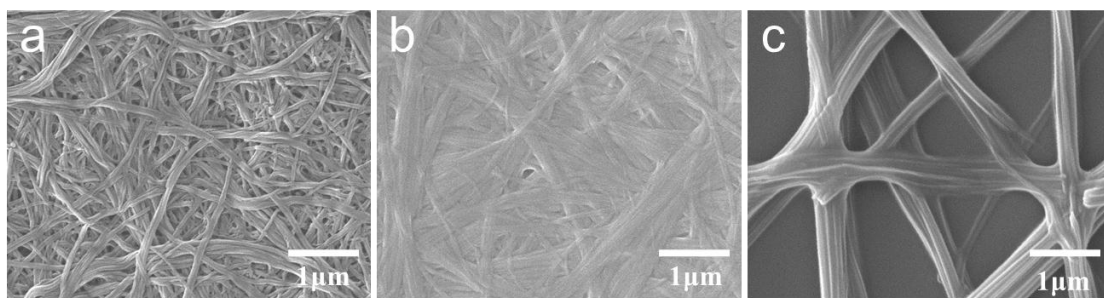

**Figure 2**

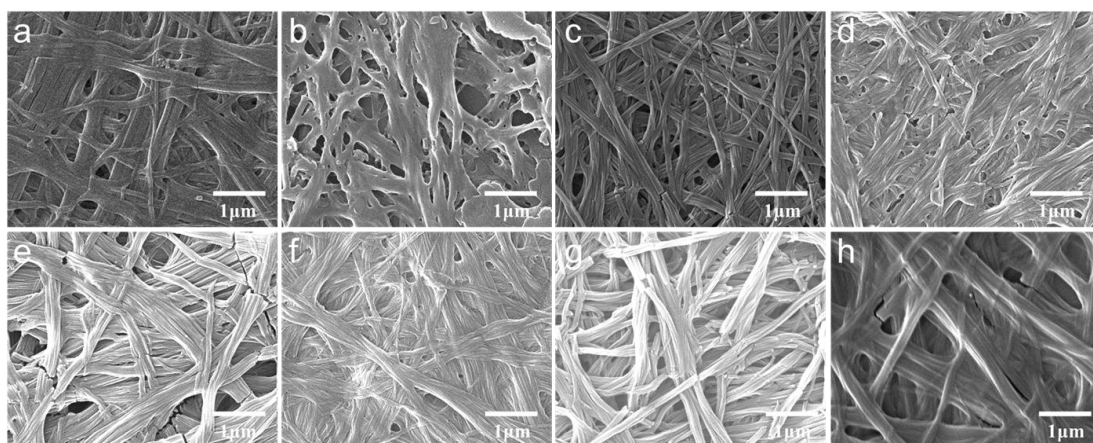

Supplement: c2tc00125j.pdf [file c2tc00125j.pdf]
